# Supplementary material
Source: Research Square preprint supplement (doi:10.21203/rs.3.rs-9320436/v1)
Supplement: Supplementary file 1 [file 2d296aca05b0376ac0664e00.docx]

APPENDEX

g = 9.81; %gravity

L1 = 0.12; %Link 1 length (m)

L2 = 0.10; %Link 2 length (m)

%Aluminium

m1_al = 0.2916;

m2_al = 0.2700;

%CFRP

m1_c = 0.1728;

m2_c = 0.1600;

%Motion parameter

A = pi/4;

w = pi;

%Time vector

t = 0:0.01:2;

%joint angle

q1 = A*sin(w*t);

q2 = A*sin(w*t);

%acceleration

q1dd = -A*w^2*sin(w*t);

q2dd = -A*w^2*sin(w*t);

%Inertia value

%aluminium

I1_al = 0.001400;

I2_al = 0.000900;

%CFRP

I1_c = 0.000829;

I2_c = 0.000533;

% Torque

%Aluminium

tau1_al = I1_al .*q1dd;

tau2_al = I2_al .*q2dd;

%CFRP

tau1_c = I1_c .*q1dd;

tau2_c = I2_c .*q2dd;

%power

%Aluminium

p1_al = tau1_al .*q1dd;

p2_al = tau2_al .*q2dd;

p_total_al = p1_al + p2_al;

%CFRP

p1_c = tau1_c .*q1dd;

p2_c = tau2_c .*q2dd;

p_total_c = p1_c + p2_c;

%Energy

%Aluminum

E_al = trapz(t, p_total_al);

%CFRP

E_c = trapz(t, p_total_c);

%Display result

disp('Energy Aluminium (J):')

disp(E_c)

disp('Energy CFRP (J):')

disp(E_c)

%percentage reduction

reduction = ((E_al - E_c)/E_al)*100;

disp('Engergy Reduction (%):')

disp(reduction)

%Torque graph

figure

plot(t, tau1_al)

hold on

plot(t, tau1_c)

legend('Aluminium','CFRP')

xlabel('Time (s)')

ylabel('Torque (Nm)')

title('Joint 1 Torque Comparison')

%PLOT ENERGY COMPARISON

figure

bar([E_al E_c])

set(gca,'XTickLabel',{'Aluminium','CFRP'})

ylabel('Energy (J)')

title('Energy Consumption Comparison')
